# Supplementary material for: The role of entropy in initializing the aggregation of peptides: a first principle study on oligopeptide oligomerization
Source: Royal Society of Chemistry journal article supplement (doi:10.1039/c2cp22821a), 2011-12-12
Supplement: c2cp22821a.pdf [file c2cp22821a.pdf]

## Supplementary material

The comparison of the commonly used B3LYP DFT functional and the new M05-2X DFT functional shows, that there are no significant changes in the geometries obtained. The only notable difference is the B3LYP optimized structure of the (For-Ala-NH<sub>2</sub>)<sub>2</sub> dimer with 10-membered H-bonded ring in which the two strands adopt  $\gamma$ -turn conformation because of the weaker interaction energy predicted by the B3LYP compared to the M05-2X method. However, as the M05-2X functional accounts for dispersion forces, the predicted stabilities are greater compared to those of predicted by the B3LYP functional. As the counterpoise corrected values show, the BSSE error is around 3-4 kcal.mol<sup>-1</sup> / residue thus it was necessary to apply this method for the analysis of sheets of different length.

**S1 Table 1. Backbone torsional angle values of antiparallel  $\beta$ -pleated sheet arrangements of For-(Ala)<sub>n</sub>-NH<sub>2</sub> (n=1-6) as obtained at the M05-2X/6-31G(d) level of theory.**

| Type <sup>a</sup> | H-bonds | strand | $\varphi 1$ | $\psi 1$ | $\varphi 2$ | $\psi 2$ | $\varphi 3$ | $\psi 3$ | $\varphi 4$ | $\psi 4$ | $\varphi 5$ | $\psi 5$ | $\varphi 6$ | $\psi 6$ |
|-------------------|---------|--------|-------------|----------|-------------|----------|-------------|----------|-------------|----------|-------------|----------|-------------|----------|
| S14               | 2       | A      | -158.1      | 162.2    | -           | -        | -           | -        | -           | -        | -           | -        | -           | -        |
|                   |         | B      | -158.2      | 162.4    | -           | -        | -           | -        | -           | -        | -           | -        | -           | -        |
| S10               | 2       | A      | -160.4      | 162.9    | -           | -        | -           | -        | -           | -        | -           | -        | -           | -        |
|                   |         | B      | -160.4      | 162.9    | -           | -        | -           | -        | -           | -        | -           | -        | -           | -        |
| S10/S14           | 3       | A      | -159.7      | 163      | -160.9      | 157.3    | -           | -        | -           | -        | -           | -        | -           | -        |
|                   |         | B      | -163.1      | 167.9    | -153.3      | 160.9    | -           | -        | -           | -        | -           | -        | -           | -        |
| S14               | 4       | A      | -158.6      | 161.9    | -161.4      | 163.5    | -154.9      | 161.9    | -           | -        | -           | -        | -           | -        |
|                   |         | B      | -159.2      | 162.7    | -161.7      | 164.2    | -155.7      | 162.9    | -           | -        | -           | -        | -           | -        |
| S10               | 4       | A      | -163.2      | 168.8    | -155.1      | 161.5    | -160.7      | 157.7    | -           | -        | -           | -        | -           | -        |
|                   |         | B      | -163.2      | 168.8    | -155.1      | 161.5    | -160.7      | 157.7    | -           | -        | -           | -        | -           | -        |
| S10/S14           | 5       | A      | -163.5      | 168.3    | -155.9      | 161.7    | -162.2      | 163.1    | 174         | -153.9   | -           | -        | -           | -        |
|                   |         | B      | -159.3      | 162.8    | -162        | 163.9    | -156.5      | 162.4    | -160.6      | 157      | -           | -        | -           | -        |
| S14               | 6       | A      | -159.4      | 162.8    | -162        | 163.6    | -156.7      | 162.6    | -161.9      | 163.3    | -154.4      | 161.6    | -           | -        |
|                   |         | B      | -159.4      | 162.8    | -162        | 163.6    | -156.7      | 162.6    | -161.9      | 163.3    | -154.4      | 161.6    | -           | -        |
| S10               | 6       | A      | -163.4      | 168.1    | -155.6      | 162.2    | -162.2      | 163.5    | -155.5      | 162      | -159.9      | 156.8    | -           | -        |
|                   |         | B      | -163.4      | 168.1    | -155.6      | 162.2    | -162.2      | 163.5    | -155.5      | 161.9    | -159.9      | 156.8    | -           | -        |
| S10/S14           | 7       | A      | -163.5      | 167.8    | -155.7      | 162.3    | -162.3      | 163.1    | -156.5      | 162.2    | -162.1      | 163      | -154.1      | 161.5    |
|                   |         | B      | -159        | 163      | -162.1      | 163.4    | -156.3      | 162.6    | -161.9      | 163.4    | -155.5      | 162.4    | -160        | 156.6    |

<sup>a</sup> Antiparallel sheets contain alternating 10- and 14-membered H-bonded rings. In the case of even H-bond number, the sheet contains an uneven number of 10- and 14-membered, H-bonded systems resulting in 2 possible structures. S10 or S14 indicates the first H-bonded system in a given sheet (e.g. for a tripeptide, S14 indicates the S14S10S14 system while S10 indicates the S10S14S10 system). For peptides with odd H-bond number there is only one possible structure indicated as S10/S14.

**S**Table 2. Backbone torsional angle values of antiparallel  $\beta$ -pleated sheet arrangements of For-(Ala)<sub>n</sub>-NH<sub>2</sub> (n=1-6) as obtained at the B3LYP/6-31G(d) level of theory.

| Type <sup>a</sup> | H-bonds | strand | $\varphi 1$ | $\psi 1$ | $\varphi 2$ | $\psi 2$ | $\varphi 3$ | $\psi 3$ | $\varphi 4$ | $\psi 4$ | $\varphi 5$ | $\psi 5$ | $\varphi 6$ | $\psi 6$ |
|-------------------|---------|--------|-------------|----------|-------------|----------|-------------|----------|-------------|----------|-------------|----------|-------------|----------|
| S14               | 2       | A      | -151.6      | 153.7    | -           | -        | -           | -        | -           | -        | -           | -        | -           | -        |
|                   |         | B      | -151.6      | 153.7    | -           | -        | -           | -        | -           | -        | -           | -        | -           | -        |
| S10               | 2       | A      | -80.4       | 80.5     | -           | -        | -           | -        | -           | -        | -           | -        | -           | -        |
|                   |         | B      | -80.4       | 80.6     | -           | -        | -           | -        | -           | -        | -           | -        | -           | -        |
| S10/S14           | 3       | A      | -151.3      | 154.5    | -152.4      | 144.6    | -           | -        | -           | -        | -           | -        | -           | -        |
|                   |         | B      | -157        | 160.2    | -145.8      | 155.6    | -           | -        | -           | -        | -           | -        | -           | -        |
| S14               | 4       | A      | -152.1      | 155.1    | -157.6      | 156.4    | -147        | 155.8    | -           | -        | -           | -        | -           | -        |
|                   |         | B      | -152.1      | 155.1    | -157.6      | 156.4    | -147        | 155.9    | -           | -        | -           | -        | -           | -        |
| S10               | 4       | A      | -156.2      | 159.3    | -145.3      | 154.1    | -151.2      | 145.1    | -           | -        | -           | -        | -           | -        |
|                   |         | B      | -156.2      | 159.3    | -145.4      | 154.1    | -151.2      | 145      | -           | -        | -           | -        | -           | -        |
| S10/S14           | 5       | A      | -156.8      | 158.7    | -147.1      | 155.3    | -157.7      | 156.4    | -147.4      | 156.3    | -           | -        | -           | -        |
|                   |         | B      | -152        | 155.3    | -157.2      | 156.4    | -148.4      | 154.3    | -150.9      | 143.9    | -           | -        | -           | -        |
| S14               | 6       | A      | -151.9      | 155.2    | -157.4      | 156.2    | -148.8      | 156.2    | -157.2      | 155.8    | -147.5      | 155.9    | -           | -        |
|                   |         | B      | -151.9      | 155.2    | -157.4      | 156.2    | -148.8      | 156.2    | -157.2      | 155.8    | -147.5      | 155.9    | -           | -        |
| S10               | 6       | A      | -156.8      | 158.5    | -147        | 154.7    | -157.2      | 155.6    | -147.4      | 153.9    | -151        | 144.4    | -           | -        |
|                   |         | B      | -156.8      | 158.5    | -147        | 154.8    | -157.2      | 155.6    | -147.4      | 153.9    | -151        | 144.5    | -           | -        |
| S10/S14           | 7       | A      | -156.8      | 158.3    | -147.4      | 154.8    | -157.5      | 155.7    | -148.2      | 155.9    | -157.3      | 156.5    | -147.7      | 156.5    |
|                   |         | B      | -151.7      | 155.2    | -157.4      | 156.1    | -148.9      | 156      | -156.8      | 155.5    | -148        | 153.9    | -151.3      | 144.5    |

<sup>a</sup> Antiparallel sheets contain alternating 10- and 14-membered H-bonded rings. In the case of even H-bond number, the sheet contains an uneven number of 10- and 14-membered, H-bonded systems resulting in 2 possible structures. S10 or S14 indicates the first H-bonded system in a given sheet (e.g. for a tripeptide, S14 indicates the S14S10S14 system while S10 indicates the S10S14S10 system). For peptides with odd H-bond number there is only one possible structure indicated as S10/S14.

**Table 3. Thermodynamic functions of antiparallel  $\beta$ -pleated sheet arrangements of For-(Ala)<sub>n</sub>-NH<sub>2</sub> (n=1-6) as obtained at various levels of theory**

| Type <sup>a</sup> | H-bonds | B3LYP/6-31G(d)            |                           |                                          | M05-2X/6-31G(d)           |                           |                                          | M05-2X/6-311++G(d,p)/M05-2X/6-31G(d) |                           |                                          |
|-------------------|---------|---------------------------|---------------------------|------------------------------------------|---------------------------|---------------------------|------------------------------------------|--------------------------------------|---------------------------|------------------------------------------|
|                   |         | H/ kcal.mol <sup>-1</sup> | G/ kcal.mol <sup>-1</sup> | S/ Cal.mol <sup>-1</sup> K <sup>-1</sup> | H/ kcal.mol <sup>-1</sup> | G/ kcal.mol <sup>-1</sup> | S/ Cal.mol <sup>-1</sup> K <sup>-1</sup> | H/ kcal.mol <sup>-1</sup>            | G/ kcal.mol <sup>-1</sup> | S/ Cal.mol <sup>-1</sup> K <sup>-1</sup> |
| S14               | 2       | -834.188                  | -834.258                  | 147.25                                   | -834.064                  | -834.131                  | 140.559                                  | -834.337                             | -834.404                  | 147.25                                   |
| S10               | 2       | -834.173                  | -834.249                  | 160.153                                  | -834.047                  | -834.118                  | 151.186                                  | -834.321                             | -834.393                  | 160.153                                  |
| S10/S14           | 3       | -1328.67                  | -1328.77                  | 208.98                                   | -1328.48                  | -1328.58                  | 199.07                                   | -1328.91                             | -1328.99                  | 208.98                                   |
| S14               | 4       | -1823.16                  | -1823.28                  | 257.11                                   | -1822.92                  | -1823.04                  | 244.88                                   | -1823.49                             | -1823.61                  | 257.11                                   |
| S10               | 4       | -1823.14                  | -1823.27                  | 267.11                                   | -1822.90                  | -1823.03                  | 256.81                                   | -1823.47                             | -1823.59                  | 267.11                                   |
| S10/S14           | 5       | -2317.64                  | -2317.79                  | 318.23                                   | -2317.34                  | -2317.49                  | 301.58                                   | -2318.06                             | -2318.2                   | 318.23                                   |
| S14               | 6       | -2812.15                  | -2812.33                  | 373.71                                   | -2811.78                  | -2811.95                  | 348.64                                   | -2812.64                             | -2812.81                  | 373.71                                   |
| S10               | 6       | -2812.13                  | -2812.32                  | 386.25                                   | -2811.76                  | -2811.93                  | 361.78                                   | -2812.63                             | -2812.8                   | 386.25                                   |
| S10/S14           | 7       | -3306.61                  | -3306.82                  | 429.97                                   | -3306.2                   | -3306.39                  | 408.23                                   | -3307.21                             | -3307.41                  | 429.97                                   |

<sup>a</sup> Antiparallel sheets contain alternating 10- and 14-membered H-bonded rings. In the case of even H-bond number, the sheet contains an uneven number of 10- and 14-membered, H-bonded systems resulting in 2 possible structures. S10 or S14 indicates the first H-bonded system in a given sheet (e.g. for a tripeptide, S14 indicates the S14S10S14 system while S10 indicates the S10S14S10 system). For peptides with odd H-bond number there is only one possible structure indicated as S10/S14.

**Table 4. Thermodynamic functions of antiparallel  $\beta$ -pleated sheet arrangements of For-(Ala)<sub>n</sub>-NH<sub>2</sub> (n=1-6) in water as obtained at the M05-2X/6-311++G(d,p)/M05-2X/6-31G(d) level of theory**

| Type <sup>a</sup> | H-bonds | M05-2X/6-311++G(d,p)/M05-2X/6-31G(d) |                           |                                          |
|-------------------|---------|--------------------------------------|---------------------------|------------------------------------------|
|                   |         | H/ kcal.mol <sup>-1</sup>            | G/ kcal.mol <sup>-1</sup> | S/ Cal.mol <sup>-1</sup> K <sup>-1</sup> |
| S14               | 2       | -834.355                             | -834.422                  | 147.25                                   |
| S10               | 2       | -834.35                              | -834.422                  | 160.153                                  |
| S10/S14           | 3       | -1328.93                             | -1329.03                  | 208.98                                   |
| S14               | 4       | -1823.52                             | -1823.64                  | 257.11                                   |
| S10               | 4       | -1823.51                             | -1823.64                  | 267.11                                   |
| S10/S14           | 5       | -2318.1                              | -2318.24                  | 318.23                                   |
| S14               | 6       | -2812.68                             | -2812.85                  | 373.71                                   |
| S10               | 6       | -2812.68                             | -2812.85                  | 386.25                                   |
| S10/S14           | 7       | -3307.26                             | -3307.46                  | 429.97                                   |

<sup>a</sup> Antiparallel sheets contain alternating 10- and 14-membered H-bonded rings. In the case of even H-bond number, the sheet contains an uneven number of 10- and 14-membered, H-bonded systems resulting in 2 possible structures. S10 or S14 indicates the first H-bonded system in a given sheet (e.g. for a tripeptide, S14 indicates the S14S10S14 system while S10 indicates the S10S14S10 system). For peptides with odd H-bond number there is only one possible structure indicated as S10/S14.

**STable 5. The change in thermodynamic functions during the dimerization of antiparallel  $\beta$ -pleated sheet arrangements of For-(Ala)<sub>n</sub>-NH<sub>2</sub> (n=1-6) as obtained at various levels of theory**

| Type <sup>a</sup> | H-bonds | B3LYP/6-31G(d)                  |                                 |                                  | M05-2X/6-31G(d)                 |                                 |                                  | M05-2X/6-311++G(d,p)//M05-2X/6-31G(d) |                                 |                                  |
|-------------------|---------|---------------------------------|---------------------------------|----------------------------------|---------------------------------|---------------------------------|----------------------------------|---------------------------------------|---------------------------------|----------------------------------|
|                   |         | $\Delta H/\text{kcal.mol}^{-1}$ | $\Delta G/\text{kcal.mol}^{-1}$ | $T\Delta S/\text{kcal.mol}^{-1}$ | $\Delta H/\text{kcal.mol}^{-1}$ | $\Delta G/\text{kcal.mol}^{-1}$ | $T\Delta S/\text{kcal.mol}^{-1}$ | $\Delta H/\text{kcal.mol}^{-1}$       | $\Delta G/\text{kcal.mol}^{-1}$ | $T\Delta S/\text{kcal.mol}^{-1}$ |
| S14               | 2       | -17.28                          | -4.89                           | -12.31                           | -20.93                          | -7.97                           | -12.96                           | -18.98                                | -6.02                           | -12.96                           |
| S10               | 2       | -7.87                           | 0.65                            | -8.47                            | -9.89                           | -0.10                           | -9.79                            | -8.66                                 | 1.14                            | -9.79                            |
| S10/S14           | 3       | -17.54                          | -4.88                           | -12.58                           | -22.62                          | -8.88                           | -13.74                           | -20.46                                | -6.72                           | -13.74                           |
| S14               | 4       | -28.29                          | -12.18                          | -16.11                           | -36.54                          | -18.98                          | -17.57                           | -33.13                                | -15.56                          | -17.57                           |
| S10               | 4       | -17.43                          | -4.30                           | -13.13                           | -24.33                          | -10.32                          | -14.01                           | -21.88                                | -7.87                           | -14.01                           |
| S10/S14           | 5       | -28.16                          | -11.60                          | -16.56                           | -37.91                          | -18.74                          | -19.17                           | -34.30                                | -15.13                          | -19.17                           |
| S14               | 6       | -38.70                          | -18.95                          | -19.63                           | -51.64                          | -28.71                          | -22.93                           | -46.82                                | -23.89                          | -22.93                           |
| S10               | 6       | -28.13                          | -12.14                          | -15.89                           | -39.46                          | -20.44                          | -19.01                           | -35.59                                | -16.58                          | -19.01                           |
| S10/S14           | 7       | -38.45                          | -18.06                          | -20.39                           | -53.03                          | -28.67                          | -24.36                           | -47.99                                | -23.62                          | -24.36                           |

<sup>a</sup> Antiparallel sheets contain alternating 10- and 14-membered H-bonded rings. In the case of even H-bond number, the sheet contains an uneven number of 10- and 14-membered, H-bonded systems resulting in 2 possible structures. S10 or S14 indicates the first H-bonded system in a given sheet (e.g. for a tripeptide, S14 indicates the S14S10S14 system while S10 indicates the S10S14S10 system). For peptides with odd H-bond number there is only one possible structure indicated as S10/S14.

**STable 6. The change in thermodynamic functions during the dimerization of antiparallel  $\beta$ -pleated sheet arrangements of For-(Ala)<sub>n</sub>-NH<sub>2</sub> (n=1-6) in water as obtained at the M05-2X/6-311++G(d,p)//M05-2X/6-31G(d) level of theory**

| Type <sup>a</sup> | H-bonds | M05-2X/6-311++G(d,p)//M05-2X/6-31G(d) |                                 |                                  |
|-------------------|---------|---------------------------------------|---------------------------------|----------------------------------|
|                   |         | $\Delta H/\text{kcal.mol}^{-1}$       | $\Delta G/\text{kcal.mol}^{-1}$ | $T\Delta S/\text{kcal.mol}^{-1}$ |
| S14               | 2       | -8.75                                 | 4.21                            | -12.96                           |
| S10               | 2       | -5.30                                 | 4.49                            | -9.79                            |
| S10/S14           | 3       | -11.72                                | 2.02                            | -13.74                           |
| S14               | 4       | -18.24                                | -0.68                           | -17.57                           |
| S10               | 4       | -14.77                                | -0.76                           | -14.01                           |
| S10/S14           | 5       | -21.28                                | -2.11                           | -19.17                           |
| S14               | 6       | -27.80                                | -4.87                           | -22.93                           |
| S10               | 6       | -24.46                                | -5.44                           | -19.01                           |
| S10/S14           | 7       | -30.89                                | -6.53                           | -24.36                           |

<sup>a</sup> Antiparallel sheets contain alternating 10- and 14-membered H-bonded rings. In the case of even H-bond number, the sheet contains an uneven number of 10- and 14-membered, H-bonded systems resulting in 2 possible structures. S10 or S14 indicates the first H-bonded system in a given sheet (e.g. for a tripeptide, S14 indicates the S14S10S14 system while S10 indicates the S10S14S10 system). For peptides with odd H-bond number there is only one possible structure indicated as S10/S14.

**STable 7. Backbone torsional angle values of parallel  $\beta$ -pleated sheet arrangements of For-(Ala)<sub>n</sub>-NH<sub>2</sub> (n=1-6) as obtained at the M05-2X/6-31G(d) level of theory.**

| Type <sup>a</sup> | H-bonds <sup>b</sup> | strand | $\varphi_1$ | $\psi_1$ | $\varphi_2$ | $\psi_2$ | $\varphi_3$ | $\psi_3$ | $\varphi_4$ | $\psi_4$ | $\varphi_5$ | $\psi_5$ | $\varphi_6$ | $\psi_6$ |
|-------------------|----------------------|--------|-------------|----------|-------------|----------|-------------|----------|-------------|----------|-------------|----------|-------------|----------|
| S12               | 2                    | A      | -160.9      | 165.1    | -           | -        | -           | -        | -           | -        | -           | -        | -           | -        |
|                   |                      | B      | -82.6       | 73.6     | -           | -        | -           | -        | -           | -        | -           | -        | -           | -        |
| S12               | 3                    | A      | -155.8      | -150.5   | -161.4      | 163.9    | -           | -        | -           | -        | -           | -        | -           | -        |
|                   |                      | B      | -158.2      | 147.1    | -82.2       | 76.3     | -           | -        | -           | -        | -           | -        | -           | -        |
| S12               | 4                    | A      | -153.2      | 160.5    | -162.6      | -164.4   | -159.5      | 164.3    | -           | -        | -           | -        | -           | -        |
|                   |                      | B      | -159        | 159.7    | -148.9      | 141.6    | -83.1       | 77.1     | -           | -        | -           | -        | -           | -        |
| S12               | 5                    | A      | -162.5      | 167.9    | -150.7      | 160.4    | -160.2      | -165.7   | -159.2      | 164      | -           | -        | -           | -        |
|                   |                      | B      | -157.5      | 160.9    | -159.6      | 162.5    | -151.7      | 144.5    | -83.4       | 76.7     | -           | -        | -           | -        |
| S12               | 6*                   | A      | -159.8      | 155.2    | -156        | 160.6    | -159.5      | 166.2    | -153        | 145.2    | -83.1       | 77.4     | -           | -        |
|                   |                      | B      | -155.9      | 162.9    | -161.6      | 164.1    | -153.1      | 162.8    | -158.6      | -162.8   | -159.7      | 164.4    | -           | -        |
| S12               | 7*                   | A      | -162.2      | 166.1    | -154        | 162.7    | 177.8       | -160.4   | -152.4      | 162.5    | -158.6      | -162.9   | -159.8      | 164.1    |
|                   |                      | B      | -156.3      | 163.4    | -157.5      | 153      | -157.1      | 162.3    | -158.7      | 166      | -153.6      | 145.6    | -83         | 77.5     |

<sup>a</sup> S12: parallel sheets containing 12-membered H-bonded rings.

<sup>b</sup> \*: structures with 1 imaginary frequency. This partial optimization was found to be sufficient as the error in entropy values obtained is smaller than 0.5 kcal.mol<sup>-1</sup>.

**STable 8. Thermodynamic functions of parallel  $\beta$ -pleated sheet arrangements of For-(Ala)<sub>n</sub>-NH<sub>2</sub> (n=1-6) as obtained at various levels of theory**

| Type <sup>a</sup> | H-bonds <sup>b</sup> | M05-2X/6-31G(d)           |                           |                                          |                           | M05-2X/6-311++G(d,p)/M05-2X/6-31G(d) |                                          |                                          |  |
|-------------------|----------------------|---------------------------|---------------------------|------------------------------------------|---------------------------|--------------------------------------|------------------------------------------|------------------------------------------|--|
|                   |                      | H/ kcal.mol <sup>-1</sup> | G/ kcal.mol <sup>-1</sup> | S/ Cal.mol <sup>-1</sup> K <sup>-1</sup> | H/ kcal.mol <sup>-1</sup> | G/ kcal.mol <sup>-1</sup>            | S/ Cal.mol <sup>-1</sup> K <sup>-1</sup> | S/ Cal.mol <sup>-1</sup> K <sup>-1</sup> |  |
| S12               | 2                    | -834.064                  | -834.13                   | 138.474                                  | -834.335                  | -834.401                             | 138.474                                  | 138.474                                  |  |
| S12               | 3                    | -1328.48                  | -1328.58                  | 191.39                                   | -1328.9                   | -1328.99                             | 191.39                                   | 191.39                                   |  |
| S12               | 4                    | -1822.91                  | -1823.03                  | 248.15                                   | -1823.48                  | -1823.6                              | 248.15                                   | 248.15                                   |  |
| S12               | 5                    | -2317.34                  | -2317.48                  | 302.289                                  | -2318.05                  | -2318.2                              | 302.289                                  | 302.289                                  |  |
| S12               | 6*                   | -2811.77                  | -2811.93                  | 348.03                                   | -2812.63                  | -2812.79                             | 348.03                                   | 348.03                                   |  |
| S12               | 7*                   | -3306.19                  | -3306.38                  | 404.26                                   | -3307.2                   | -3307.4                              | 404.26                                   | 404.26                                   |  |

<sup>a</sup> S12: parallel sheets containing 12-membered H-bonded rings.

<sup>b</sup> \*: structures with 1 imaginary frequency. This partial optimization was found to be sufficient as the error in entropy values obtained is smaller than 0.5 kcal.mol<sup>-1</sup>.

**STable 9. Thermodynamic functions of parallel  $\beta$ -pleated sheet arrangements of For-(Ala)<sub>n</sub>-NH<sub>2</sub> (n=1-6) in water as obtained at the M05-2X/6-31G(d,p)//M05-2X/6-31G(d) level of theory**

| Type <sup>a</sup> | H-bonds | M05-2X/6-31G(d,p)//M05-2X/6-31G(d) |                           |                                          |
|-------------------|---------|------------------------------------|---------------------------|------------------------------------------|
|                   |         | H/ kcal.mol <sup>-1</sup>          | G/ kcal.mol <sup>-1</sup> | S/ Cal.mol <sup>-1</sup> K <sup>-1</sup> |
| S12               | 2       | -834.354                           | -834.42                   | 138.474                                  |
| S12               | 3       | -1328.93                           | -1329.02                  | 191.39                                   |
| S12               | 4       | -1823.51                           | -1823.63                  | 248.15                                   |
| S12.              | 5       | -2318.09                           | -2318.24                  | 302.289                                  |
| S12               | 6*      | -2812.67                           | -2812.84                  | 348.03                                   |

<sup>a</sup> S12: parallel sheets containing 12-membered H-bonded rings.

<sup>b</sup> \*: structures with 1 imaginary frequency. This partial optimization was found to be sufficient as the error in entropy values obtained is smaller than 0.5 kcal.mol<sup>-1</sup>

**STable 10. The averaged values of antiparallel  $\beta$ -pleated sheet structures of For-(Ala)<sub>n</sub>-NH<sub>2</sub> (n=1-6) and the change in thermodynamic functions during the dimerization of parallel  $\beta$ -pleated sheet arrangements of For-(Ala)<sub>n</sub>-NH<sub>2</sub> (n=1-6) as obtained at various levels of theory.**

| Type <sup>a</sup> | H-bonds <sup>b</sup> | M05-2X/6-31G(d,p)//M05-2X/6-31G(d) vacuum |                                     |                                      | M05-2X/6-31G(d,p)//M05-2X/6-31G(d) water |                                     |                                      |
|-------------------|----------------------|-------------------------------------------|-------------------------------------|--------------------------------------|------------------------------------------|-------------------------------------|--------------------------------------|
|                   |                      | $\Delta H$ / kcal.mol <sup>-1</sup>       | $\Delta G$ / kcal.mol <sup>-1</sup> | $T\Delta S$ / kcal.mol <sup>-1</sup> | $\Delta H$ / kcal.mol <sup>-1</sup>      | $\Delta G$ / kcal.mol <sup>-1</sup> | $T\Delta S$ / kcal.mol <sup>-1</sup> |
| S12               | 2                    | -17.67                                    | -4.09                               | -13.58                               | -7.98                                    | 5.60                                | -13.58                               |
| S12               | 3                    | -19.80                                    | -3.77                               | -16.03                               | -9.92                                    | 6.11                                | -16.03                               |
| S12               | 4                    | -24.92                                    | -8.33                               | -16.59                               | -13.17                                   | 3.42                                | -16.59                               |
| S12.              | 5                    | -30.61                                    | -11.66                              | -18.96                               | -17.60                                   | 1.36                                | -18.96                               |
| S12               | 6*                   | -36.34                                    | -13.22                              | -23.11                               | -21.49                                   | 1.63                                | -23.11                               |
| S12               | 7*                   | -42.11                                    | -16.57                              | -25.55                               | -                                        | -                                   | -                                    |
| Avg.              | 2                    | -13.82                                    | -2.44                               | -11.37                               | -7.03                                    | 4.35                                | -11.37                               |
| Avg.              | 3                    | -20.46                                    | -6.72                               | -13.74                               | -11.72                                   | 2.02                                | -13.74                               |
| Avg.              | 4                    | -27.50                                    | -11.71                              | -15.79                               | -16.51                                   | -0.72                               | -15.79                               |
| Avg.              | 5                    | -34.30                                    | -15.13                              | -19.17                               | -21.28                                   | -2.11                               | -19.17                               |
| Avg.              | 6                    | -41.21                                    | -20.23                              | -20.97                               | -26.13                                   | -5.16                               | -20.97                               |
| Avg.              | 7                    | -47.99                                    | -23.62                              | -24.36                               | -30.89                                   | -6.53                               | -24.36                               |

<sup>a</sup> S12: parallel sheets containing 12-membered H-bonded rings. Avg.: Average of the values obtained for S10 and S14 (starting with 10- or 14-membered H-bonded system) antiparallel sheets with the same residue number.

<sup>b</sup> \*: structures with 1 imaginary frequency. This partial optimization was found to be sufficient as the error in entropy values obtained is smaller than 0.5 kcal.mol<sup>-1</sup>.

In the multiple stranded case, here is reported the comparison of the values obtained from the calculations at two levels of theory, M05-2X/6-31G(d) and M05-2X/6-311++G(d,p). The calculations carried out with the triple zeta basis set show lower stability for the sheets, in accord with the decreasing BSSE with the increasing size of the basis set.

**STable 11. Thermodynamic functions of parallel  $\beta$ -pleated sheet arrangements of monoalanine strands as obtained at various levels of theory**

| Type <sup>a</sup> | Strands | M05-2X/6-31G(d)           |                           |                                          | M05-2X/6-311++G(d,p)      |                           |                                          |
|-------------------|---------|---------------------------|---------------------------|------------------------------------------|---------------------------|---------------------------|------------------------------------------|
|                   |         | H/ kcal.mol <sup>-1</sup> | G/ kcal.mol <sup>-1</sup> | S/ Cal.mol <sup>-1</sup> K <sup>-1</sup> | H/ kcal.mol <sup>-1</sup> | G/ kcal.mol <sup>-1</sup> | S/ Cal.mol <sup>-1</sup> K <sup>-1</sup> |
| -                 | 1       | -417.02                   | -417.06                   | 92.01                                    | -417.15                   | -417.20                   | 92.01                                    |
| S12               | 2       | -834.06                   | -834.13                   | 138.47                                   | -834.34                   | -834.40                   | 138.47                                   |
| S12               | 3       | -1251.10                  | -1251.20                  | 192.58                                   | -1251.51                  | -1251.60                  | 192.58                                   |
| S12.              | 4       | -1668.14                  | -1668.26                  | 244.75                                   | -1668.69                  | -1668.80                  | 244.75                                   |
| S12               | 5       | -2085.19                  | -2085.33                  | 298.73                                   | -2085.86                  | -2086.00                  | 298.73                                   |
| S12               | 6       | -2502.23                  | -2502.39                  | 349.75                                   | -2503.04                  | -2503.20                  | 349.75                                   |

<sup>a</sup> S12: parallel sheets containing 12-membered H-bonded rings

**STable 12. Thermodynamic functions of antiparallel  $\beta$ -pleated sheet arrangements of monoalanine strands as obtained at various levels of theory**

| Type <sup>a</sup> | Strands | M05-2X/6-31G(d)           |                           |                                          | M05-2X/6-311G++(d,p)      |                           |                                          |
|-------------------|---------|---------------------------|---------------------------|------------------------------------------|---------------------------|---------------------------|------------------------------------------|
|                   |         | H/ kcal.mol <sup>-1</sup> | G/ kcal.mol <sup>-1</sup> | S/ Cal.mol <sup>-1</sup> K <sup>-1</sup> | H/ kcal.mol <sup>-1</sup> | G/ kcal.mol <sup>-1</sup> | S/ Cal.mol <sup>-1</sup> K <sup>-1</sup> |
| S14               | 2       | -834.05                   | -834.12                   | 151.19                                   | -834.32                   | -834.39                   | 151.19                                   |
| S10               | 2       | -834.06                   | -834.13                   | 140.56                                   | -834.34                   | -834.40                   | 140.56                                   |
| S10/S14           | 3       | -1251.10                  | -1251.19                  | 199.78                                   | -1251.51                  | -1251.60                  | 199.78                                   |
| S14               | 4       | -1668.13                  | -1668.25                  | 259.72                                   | -1668.68                  | -1668.80                  | 259.72                                   |
| S10               | 4       | -1668.15                  | -1668.27                  | 245.97                                   | -1668.69                  | -1668.81                  | 245.97                                   |
| S10/S14           | 5       | -2085.18                  | -2085.33                  | 305.92                                   | -2085.86                  | -2086.01                  | 305.92                                   |
| S14               | 6       | -2502.22                  | -2502.39                  | 364.80                                   | -2503.03                  | -2503.21                  | 364.80                                   |
| S10               | 6       | -2502.24                  | -2502.40                  | 351.68                                   | -2503.05                  | -2503.22                  | 351.68                                   |

<sup>a</sup> Antiparallel sheets contain alternating 10- and 14-membered H-bonded rings. In the case of even strand number, the sheet contains an uneven number of 10- and 14-membered, H-bonded systems resulting in 2 possible structures. S10 or S14 indicates the first H-bonded system in a given sheet (e.g. for a tetramer, S14 indicates the S14S10S14 system while S10 indicates the S10S14S10 system). For peptides with odd strand number there is only one possible structure indicated as S10/S14.

**STable 13. The averaged values of antiparallel  $\beta$ -pleated sheet structures of monoalanine strands and the change in thermodynamic functions during the oligomerization of parallel  $\beta$ -pleated sheet arrangements of monoalanine strands as obtained at various levels of theory.**

| Type <sup>a</sup> | Strands | M05-2X/6-31G(d)                       |                                       |                                        | M05-2X/6-311++G(d,p)                  |                                       |                                        |
|-------------------|---------|---------------------------------------|---------------------------------------|----------------------------------------|---------------------------------------|---------------------------------------|----------------------------------------|
|                   |         | $\Delta H/$<br>kcal.mol <sup>-1</sup> | $\Delta G/$<br>kcal.mol <sup>-1</sup> | $T\Delta S/$<br>kcal.mol <sup>-1</sup> | $\Delta H/$<br>kcal.mol <sup>-1</sup> | $\Delta G/$<br>kcal.mol <sup>-1</sup> | $T\Delta S/$<br>kcal.mol <sup>-1</sup> |
| Avg.              | 2       | -7.71                                 | -2.02                                 | -5.69                                  | -6.91                                 | -1.22                                 | -5.69                                  |
| Avg.              | 3       | -10.74                                | -3.16                                 | -7.58                                  | -9.67                                 | -2.09                                 | -7.58                                  |
| Avg.              | 4       | -12.36                                | -3.77                                 | -8.59                                  | -11.11                                | -2.52                                 | -8.59                                  |
| Avg.              | 5       | -13.33                                | -4.14                                 | -9.19                                  | -12.01                                | -2.81                                 | -9.19                                  |
| Avg.              | 6       | -13.97                                | -4.34                                 | -9.63                                  | -12.57                                | -2.94                                 | -9.63                                  |
| S12               | 2       | -10.34                                | -3.55                                 | -6.79                                  | -8.83                                 | -2.04                                 | -6.79                                  |
| S12               | 3       | -12.06                                | -3.77                                 | -8.29                                  | -10.59                                | -2.29                                 | -8.29                                  |
| S12               | 4       | -12.99                                | -3.80                                 | -9.19                                  | -11.37                                | -2.18                                 | -9.19                                  |
| S12               | 5       | -13.55                                | -3.93                                 | -9.62                                  | -11.87                                | -2.25                                 | -9.62                                  |
| S12               | 6       | -13.93                                | -3.87                                 | -10.05                                 | -12.21                                | -2.16                                 | -10.05                                 |

<sup>a</sup> S12: parallel sheets containing 12-membered H-bonded rings. Avg.: Average of the values obtained for S10 and S14 (starting with 10- or 14-membered H-bonded system) antiparallel sheets with the same strand number.

**STable 14. Thermodynamic functions of parallel  $\beta$ -pleated sheet arrangements of dialanine strands as obtained at various levels of theory**

| Type <sup>a</sup> | Strands | M05-2X/6-31G(d)             |                             |                                            | M05-2X/6-311++G(d,p)        |                             |                                            |
|-------------------|---------|-----------------------------|-----------------------------|--------------------------------------------|-----------------------------|-----------------------------|--------------------------------------------|
|                   |         | $H/$ kcal.mol <sup>-1</sup> | $G/$ kcal.mol <sup>-1</sup> | $S/$ Cal.mol <sup>-1</sup> K <sup>-1</sup> | $H/$ kcal.mol <sup>-1</sup> | $G/$ kcal.mol <sup>-1</sup> | $S/$ Cal.mol <sup>-1</sup> K <sup>-1</sup> |
| -                 | 1       | -664.22                     | -664.28                     | 122.58                                     | -664.44                     | -664.44                     | 122.58                                     |
| S12               | 2       | -1328.48                    | -1328.58                    | 191.39                                     | -1328.90                    | -1328.90                    | 191.39                                     |
| S12               | 3       | -1992.74                    | -1992.87                    | 275.43                                     | -1993.36                    | -1993.36                    | 275.43                                     |
| S12               | 4       | -2657.00                    | -2657.17                    | 350.75                                     | -2657.84                    | -2657.84                    | 350.75                                     |
| S12               | 5       | -3321.26                    | -3321.46                    | 427.32                                     | -3322.30                    | -3322.30                    | 427.32                                     |
| S12               | 6       | -3985.51                    | -3985.76                    | 514.55                                     | -3986.77                    | -3986.77                    | 514.55                                     |

<sup>a</sup> S12: parallel sheets containing 12-membered H-bonded rings



**Table 15. Thermodynamic functions of antiparallel  $\beta$ -pleated sheet arrangements of dialanine strands as obtained at various levels of theory**

| Type <sup>a</sup> | Strands | M05-2X/6-31G(d)           |                           |                                          | M05-2X/6-311G++(d,p)      |                           |                                          |
|-------------------|---------|---------------------------|---------------------------|------------------------------------------|---------------------------|---------------------------|------------------------------------------|
|                   |         | H/ kcal.mol <sup>-1</sup> | G/ kcal.mol <sup>-1</sup> | S/ Cal.mol <sup>-1</sup> K <sup>-1</sup> | H/ kcal.mol <sup>-1</sup> | G/ kcal.mol <sup>-1</sup> | S/ Cal.mol <sup>-1</sup> K <sup>-1</sup> |
| -                 | 1       | -664.22                   | -664.28                   | 122.58                                   | -664.44                   | -664.49                   | 122.58                                   |
| S10/S14           | 2       | -1328.48                  | -1328.58                  | 199.07                                   | -1328.90                  | -1329.00                  | 199.07                                   |
| S10/S14           | 3       | -1992.75                  | -1992.88                  | 275.64                                   | -1993.38                  | -1993.51                  | 275.64                                   |
| S10/S14           | 4       | -2657.01                  | -2657.18                  | 354.48                                   | -2657.85                  | -2658.02                  | 354.48                                   |
| S10/S14           | 5       | -3321.27                  | -3321.47                  | 427.79                                   | -3322.32                  | -3322.52                  | 427.79                                   |
| S10/S14           | 6       | -3985.53                  | -3985.78                  | 507.67                                   | -3986.79                  | -3987.03                  | 507.67                                   |

<sup>a</sup> Antiparallel sheets contain alternating 10- and 14-membered H-bonded rings. In the case of even strand number, the sheet contains an uneven number of 10- and 14-membered, H-bonded systems resulting in 2 possible structures. S10 or S14 indicates the first H-bonded system in a given sheet (e.g. for a tetramer, S14 indicates the S14S10S14 system while S10 indicates the S10S14S10 system). For peptides with odd strand number there is only one possible structure indicated as S10/S14.

**Table 16. The averaged values of antiparallel  $\beta$ -pleated sheet structures of the dialanine strands and the change in thermodynamic functions during the oligomerization of parallel  $\beta$ -pleated sheet arrangements of dialanine strands as obtained at various levels of theory.**

| Type <sup>a</sup> | Strands | M05-2X/6-31G(d)                       |                                       |                                        | M05-2X/6-311++G(d,p)                  |                                       |                                        |
|-------------------|---------|---------------------------------------|---------------------------------------|----------------------------------------|---------------------------------------|---------------------------------------|----------------------------------------|
|                   |         | $\Delta H/$<br>kcal.mol <sup>-1</sup> | $\Delta G/$<br>kcal.mol <sup>-1</sup> | $T\Delta S/$<br>kcal.mol <sup>-1</sup> | $\Delta H/$<br>kcal.mol <sup>-1</sup> | $\Delta G/$<br>kcal.mol <sup>-1</sup> | $T\Delta S/$<br>kcal.mol <sup>-1</sup> |
| S10/S14           | 2       | -11.31                                | -4.44                                 | 6.87                                   | -10.23                                | -3.36                                 | 6.87                                   |
| S10/S14           | 3       | -15.48                                | -6.33                                 | 6.33                                   | -13.99                                | -4.84                                 | 9.15                                   |
| S10/S14           | 4       | -17.77                                | -7.65                                 | 10.12                                  | -16.06                                | -5.94                                 | 10.12                                  |
| S10/S14           | 5       | -19.12                                | -8.08                                 | 11.04                                  | -17.28                                | -6.25                                 | 11.04                                  |
| S10/S14           | 6       | -20.02                                | -8.70                                 | 11.32                                  | -18.05                                | -6.73                                 | 11.32                                  |
| S12               | 2       | -11.58                                | -3.57                                 | 8.01                                   | -9.90                                 | -1.89                                 | 8.01                                   |
| S12               | 3       | -13.54                                | -4.37                                 | 4.37                                   | -11.78                                | -2.61                                 | 2.61                                   |
| S12               | 4       | -16.36                                | -5.96                                 | 10.40                                  | -14.42                                | -4.02                                 | 10.40                                  |
| S12               | 5       | -17.42                                | -6.36                                 | 11.07                                  | -15.26                                | -4.19                                 | 11.07                                  |
| S12               | 6       | -17.77                                | -6.79                                 | 10.98                                  | -15.63                                | -4.65                                 | 10.98                                  |

<sup>a</sup> S12: parallel sheets containing 12-membered H-bonded rings. Avg.: Average of the values obtained for S10 and S14 (starting with 10- or 14-membered H-bonded system) antiparallel sheets with the same strand number.

STable 17. Correlation between the raw and normalized thermodynamic (Y) functions, vs. the number of inter-chain H-bonds (*n*). Fitting parameters obtained

| (Y) of parallel     | Y = mn+b |       | R <sup>2</sup> | (Y/n) of parallel     | Y/n = M+B/n |       | R <sup>2</sup> |
|---------------------|----------|-------|----------------|-----------------------|-------------|-------|----------------|
|                     | m        | b     |                |                       | M           | B     |                |
| -TΔS                | 2.56     | 7.27  | 0.946          | -TΔS/n                | 2.28        | 8.59  | 0.893          |
| ΔH                  | -5.60    | -2.74 | 0.999          | ΔH/n                  | -5.54       | -3.04 | 0.956          |
| ΔG                  | -3.04    | 4.53  | 0.975          | ΔG/n                  | -3.26       | 5.54  | 0.847          |
| (Y) of antiparallel | Y = mn+b |       | R <sup>2</sup> | (Y/n) of antiparallel | Y/n = M+B/n |       | R <sup>2</sup> |
|                     | m        | b     |                |                       | M           | B     |                |
| -TΔS                | 2.57     | 5.99  | 0.993          | -TΔS/n                | 2.50        | 6.30  | 0.990          |
| ΔH                  | -6.85    | -0.04 | 0.999          | ΔH/n                  | -6.83       | -0.09 | 0.187          |
| ΔG                  | -4.28    | 5.95  | 0.997          | ΔG/n                  | -4.34       | 6.21  | 0.989          |

STable 18. Correlation between the raw and normalized thermodynamic (Y) functions, vs. the number of inter-chain H-bonds (*n*), in water. Fitting parameters obtained

| (Y) of parallel     | Y = mn+b |      | R <sup>2</sup> | (Y/n) of parallel     | Y/n = M+B/n |      | R <sup>2</sup> |
|---------------------|----------|------|----------------|-----------------------|-------------|------|----------------|
|                     | m        | b    |                |                       | M           | B    |                |
| -TΔS                | 2.56     | 6.56 | 0.896          | -TΔS/n                | 2.28        | 7.87 | 0.876          |
| ΔH                  | -3.91    | 2.06 | 0.997          | ΔH/n                  | -3.84       | 1.75 | 0.744          |
| ΔG                  | -1.55    | 10.1 | 0.838          | ΔG/n                  | -1.80       | 11.2 | 0.951          |
| (Y) of antiparallel | Y = mn+b |      | R <sup>2</sup> | (Y/n) of antiparallel | Y/n = M+B/n |      | R <sup>2</sup> |
|                     | m        | b    |                |                       | M           | B    |                |
| -TΔS                | 2.57     | 5.99 | 0.987          | -TΔS/n                | 2.50        | 6.30 | 0.990          |
| ΔH                  | -4.78    | 2.59 | 0.999          | ΔH/n                  | -4.77       | 2.53 | 0.999          |
| ΔG                  | -2.21    | 8.58 | 0.991          | ΔG/n                  | -2.56       | 8.83 | 0.996          |

STable 19. Correlation between the raw and normalized thermodynamic (Y) functions, vs. the number of peptide strands of monoalanine. Fitting parameters obtained

| (Y) of parallel     | Y = mn+b |        | R <sup>2</sup> | (Y/n) of parallel     | Y/n = M+B/n |        | R <sup>2</sup> |
|---------------------|----------|--------|----------------|-----------------------|-------------|--------|----------------|
|                     | m        | b      |                |                       | M           | B      |                |
| -TΔS                | 11.67    | -9.95  | 0.999          | -TΔS/n                | 11.60       | -9.70  | 0.997          |
| ΔH                  | -13.88   | 10.02  | 0.999          | ΔH/n                  | -13.90      | 10.09  | 0.999          |
| ΔG                  | -2.21    | 0.06   | 0.992          | ΔG/n                  | -2.30       | 0.38   | 0.059          |
| (Y) of antiparallel | Y = mn+b |        | R <sup>2</sup> | (Y/n) of antiparallel | Y/n = M+B/n |        | R <sup>2</sup> |
|                     | m        | b      |                |                       | M           | B      |                |
| -TΔS                | 11.61    | -11.98 | 0.999          | -TΔS/n                | 11.55       | -11.79 | 0.999          |
| ΔH                  | -15.42   | 17.14  | 0.999          | ΔH/n                  | -15.38      | 17.00  | 0.999          |
| ΔG                  | -3.82    | 5.16   | 0.999          | ΔG/n                  | -3.83       | 5.21   | 0.999          |

STable 20. Correlation between the raw and normalized thermodynamic (Y) functions, vs. the number of peptide strands of dialanine. Fitting parameters obtained

| (Y) of monoalanine | Y = mn+b |        | R <sup>2</sup> | (Y/n) of monoalanine | Y/n = M+B/n |        | R <sup>2</sup> |
|--------------------|----------|--------|----------------|----------------------|-------------|--------|----------------|
|                    | m        | b      |                |                      | M           | B      |                |
| -TΔS               | 11.61    | -11.98 | 0.999          | -TΔS/n               | 11.55       | -11.79 | 0.999          |
| ΔH                 | -15.42   | 17.14  | 0.999          | ΔH/n                 | -15.38      | 17.00  | 0.999          |
| ΔG                 | -3.82    | 5.16   | 0.999          | ΔG/n                 | -3.83       | 5.21   | 0.999          |
| (Y) of dialanine   | Y = mn+b |        | R <sup>2</sup> | (Y/n) of dialanine   | Y/n = M+B/n |        | R <sup>2</sup> |
|                    | m        | b      |                |                      | M           | B      |                |
| -TΔS               | 13.61    | -13.47 | 0.999          | -TΔS/n               | 13.61       | -13.47 | 0.997          |
| ΔH                 | -22.01   | 23.76  | 0.999          | ΔH/n                 | -21.95      | 23.54  | 0.999          |
| ΔG                 | -8.40    | 10.29  | 0.999          | ΔG/n                 | -8.34       | 10.07  | 0.991          |
